# Supplementary material for: Ceramides bind VDAC2 to trigger mitochondrial apoptosis
Source: PubMed Central journal article supplement (PMC6478893; doi:10.1038/s41467-019-09654-4), 2019-04-23

## **SUPPLEMENTARY INFORMATION**

### **Ceramides bind VDAC2 to trigger mitochondrial apoptosis**

Shashank Dadsena, Svenja Bockelmann, John G. M. Mina, Dina G. Hassan, Sergei Korneev, Guilherme Razzera, Helene Jahn, Patrick Niekamp, Dagmar Müller, Markus Schneider, Fikadu G. Tafesse, Siewert J. Marrink, Manuel Nuno Melo, Joost C. M. Holthuis



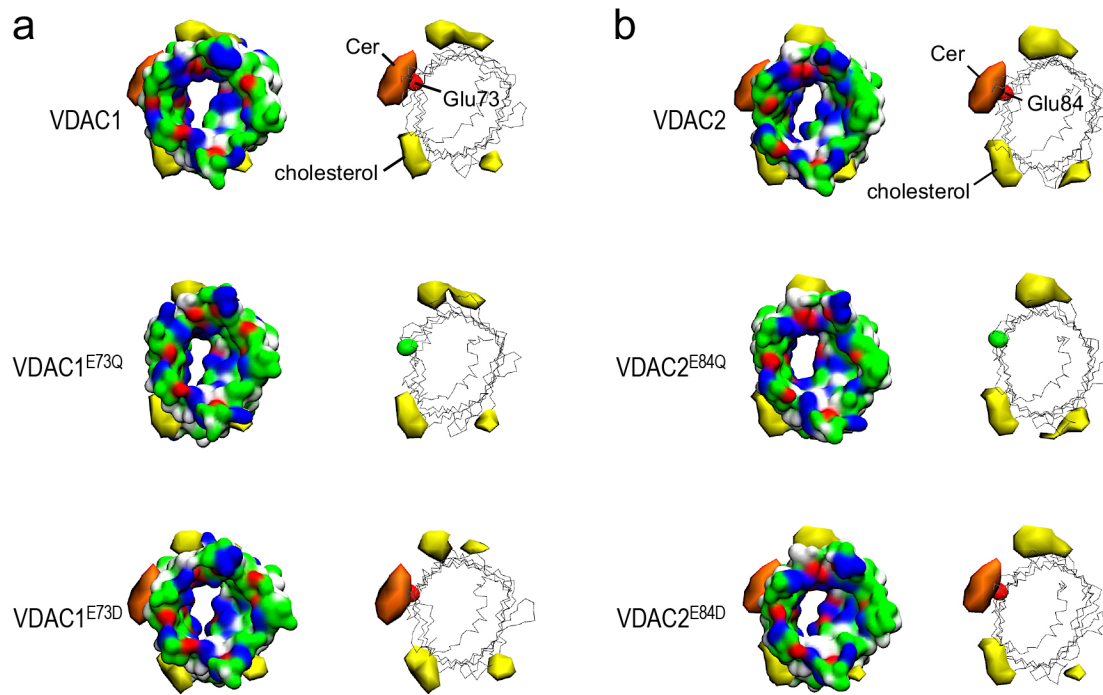

**Supplementary Figure 2 | VDACs with a Glu-to-Asp substitution retain the ability to bind ceramide.**

Space-filling and wireframe models of VDAC1, VDAC1<sup>E73Q</sup>, VDAC1<sup>E73D</sup>, VDAC2, VDAC2<sup>E84Q</sup> and VDAC2<sup>E84D</sup> with bilayer-facing deprotonated Glu and Asp residues. Indicated are the volumes for which there is ceramide occupancy greater than 10% (*orange*) or cholesterol occupancy greater than 20% (*yellow*).

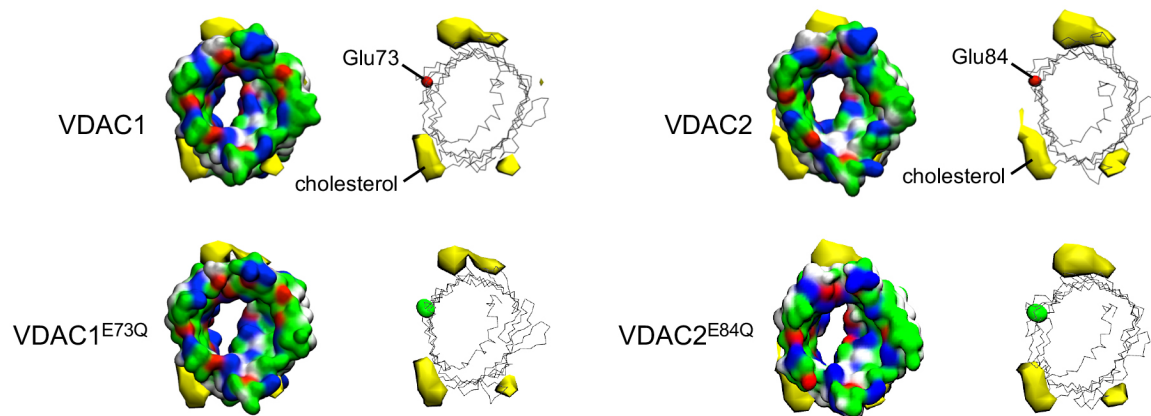

**Supplementary Figure 3 | The binding sites for cholesterol and ceramide on VDAC channels are non-overlapping.**

Space-filling and wireframe models of VDAC1, VDAC1<sup>E73Q</sup>, VDAC2 and VDAC2<sup>E84Q</sup>. Indicated are the volumes for which there is cholesterol occupancy greater than 20% (*yellow*) in MD simulations performed in the absence of ceramide. The position of the bilayer-facing deprotonated Glu residue involved in ceramide binding is marked. Note that cholesterol does not bind near the membrane-facing Glu also when ceramide is lacking, excluding the possibility that ceramide outcompetes cholesterol for its own binding site. Protein surface colours mark polar (*green*), apolar (*white*), cationic (*blue*) or anionic (*red*) residues.

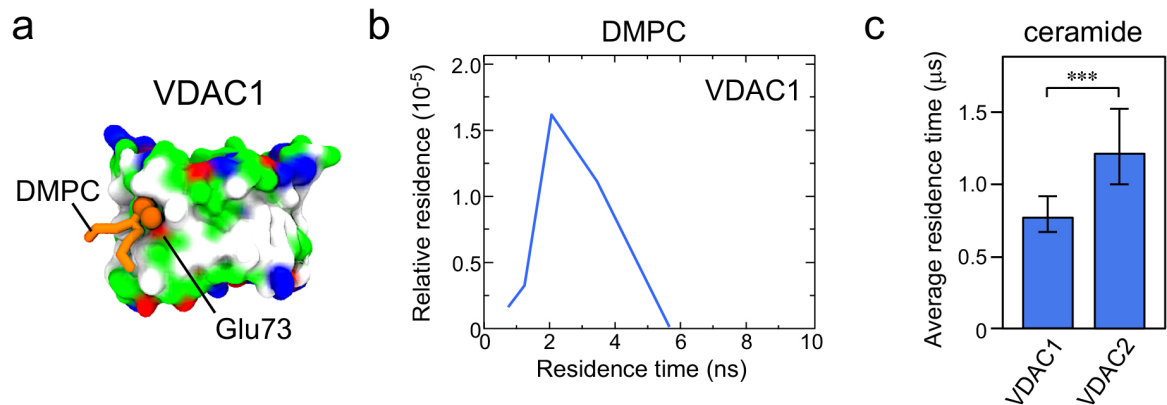

**Supplementary Figure 4 | Average residence times of DMPC and ceramide bound to VDACs in MD simulations.**

(a) Still from a MD simulation of mouse VDAC1 in a bilayer of 100% dimyristoyl-phosphatidylcholine (DMPC) showing binding of the phosphocholine head group of a DMPC molecule to the preferred ceramide binding site. The position of the bilayer-facing deprotonated Glu73 residue is indicated.

(b) Distribution of the durations of DMPC contacts at the preferred ceramide binding site. The y-axis indicates the fraction of the total system time spent in binding events of the duration indicated by  $x$ . Summing all points'  $y$ -values yields the fraction of total simulation time when DMPC was bound.

(c) Average residence times of ceramide at its preferred binding site were calculated from 1311 (VDAC1) and 710 binding-unbinding events (VDAC2) over an aggregated simulation time of 298  $\mu$ s per protein. Error bars indicate 95% confidence intervals. \*\*\* $p < 0.005$  by two-tailed paired t-test.

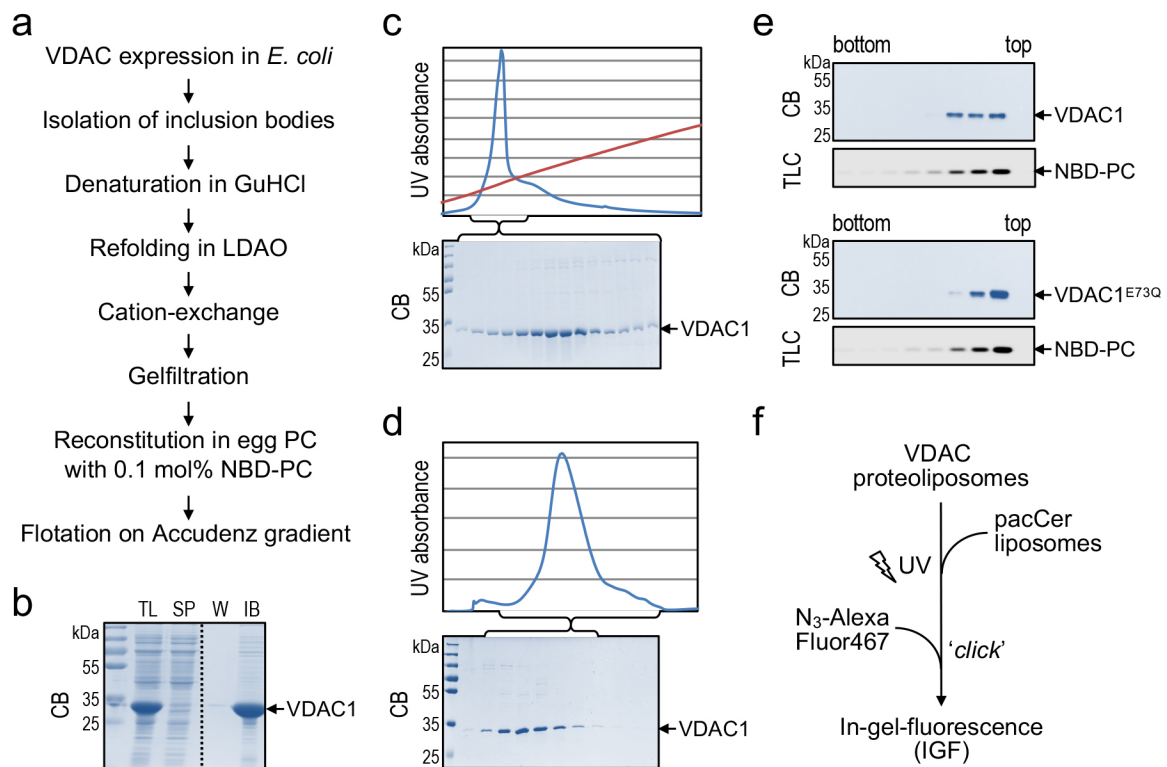

**Supplementary Figure 5 | Purification and reconstitution of human VDAC channels produced in *E. coli*.**

(a) Flow diagram outlining the purification and reconstitution of recombinant human VDAC proteins from *E. coli*.

(b) Inclusion bodies (IB) isolated from a total lysate (TL) of *E. coli* cells expressing human VDAC1 were analyzed by SDS-PAGE and Coomassie brilliant blue staining (CB). SP, supernatant; W, wash.

(c) Proteins in inclusion bodies isolated as in (b) were denatured in GuHCl, refolded in LDAO and subjected to cation-exchange column chromatography. Column fractions were analyzed by UV absorbance, SDS-PAGE and CB staining.

(d) Protein-peak fractions from (c) were subjected to gel-filtration column chromatography. Column fractions were analyzed by UV absorbance, SDS-PAGE and CB staining.

(e) Protein-peak fractions from (d) were reconstituted in egg PC spiked with 0.1 mol% NBD-PC. Reconstituted proteins were subjected to density gradient fractionation. Gradient fractions were analyzed by SDS-PAGE and CB staining or by TLC and NBD-fluorescence. Co-fractionation of VDAC1 and VDAC1<sup>E73Q</sup> with NBD-PC are shown.

(f) Flow diagram outlining the photolabeling and IFG analysis of VDAC proteoliposomes.

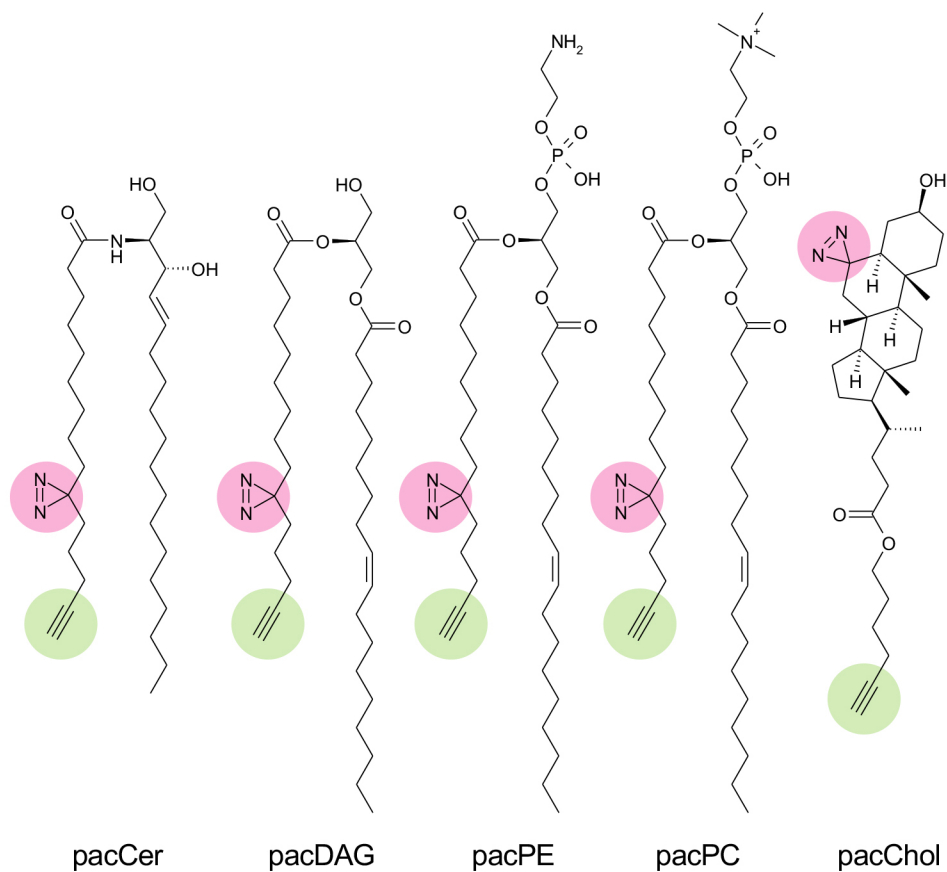

**Supplementary Figure 6 | Structures of photoactive and clickable lipid analogues.**

Structures of photoactive and clickable analogues of ceramide (pacCer), diacylglycerol (pacDAG), phosphatidylethanolamine (pacPE), phosphatidylcholine (pacPC) and cholesterol (pacChol). The clickable alkyne and photoactive diazine groups are marked in green and violet, respectively.

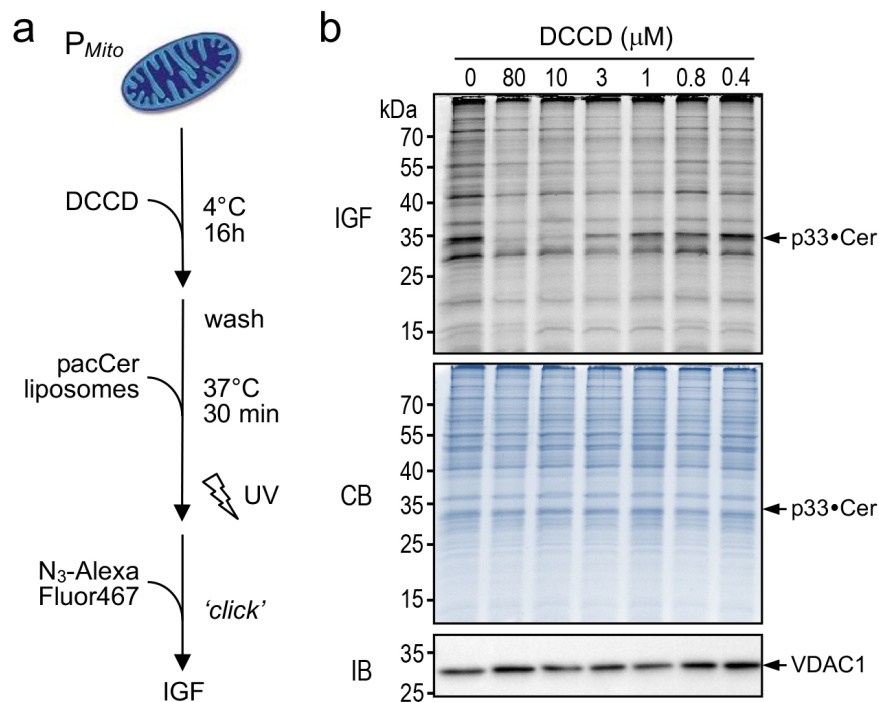

**Supplementary Figure 7 | DCCD treatment of mitochondria abolishes pacCer labeling of native VDACs.**

(a) Schematic outline of experimental procedure to determine the impact of DCCD on pacCer labeling of native VDAC channels in mitochondrial fractions isolated from HeLa cells.

(b) Crude mitochondrial fractions were pretreated with the indicated concentration of DCCD, washed, photolabeled with pacCer and then click-reacted with AF647-N<sub>3</sub>. Next, fractions were subjected to SDS-PAGE and analyzed by IGF and CB staining or by immunoblotting (IB) using an antibody against VDAC1.



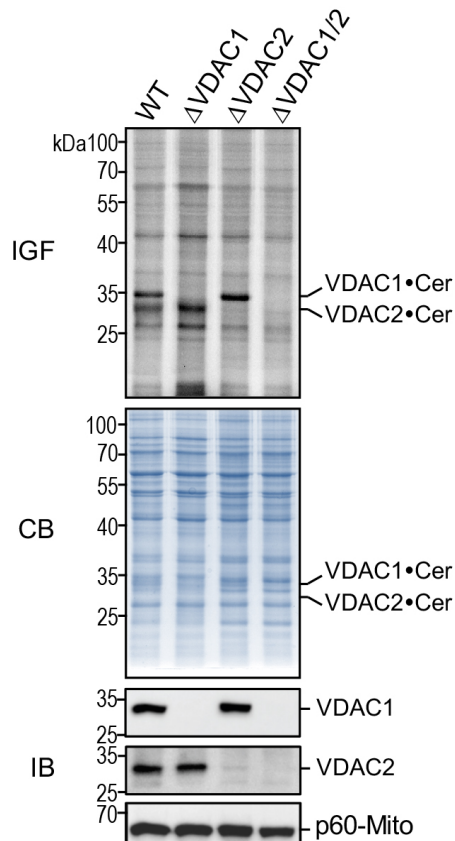

**Supplementary Figure 8 | Genetic ablation of VDAC1 and VDAC2 results in loss of pacCer-labeled 33kDa-protein.**

Human HCT116 colon cancer cell lines lacking VDAC1, VDAC2 or both were created by CRISPR/Cas9. Loss of VDAC1 and VDAC2 was confirmed by immunoblot (IB) analysis of mitochondrial pellets using antibodies against VDAC1, VDAC2 and mitochondrial marker protein p60-Mito. In addition, mitochondrial pellets were photolabeled with pacCer, click-reacted with AF647-N<sub>3</sub>, subjected to SDS-PAGE and analyzed by IGF and CB staining. Note that removal of both VDAC1 and VDAC2 was accompanied by a complete loss of ~33kDa photolabeled protein bands.

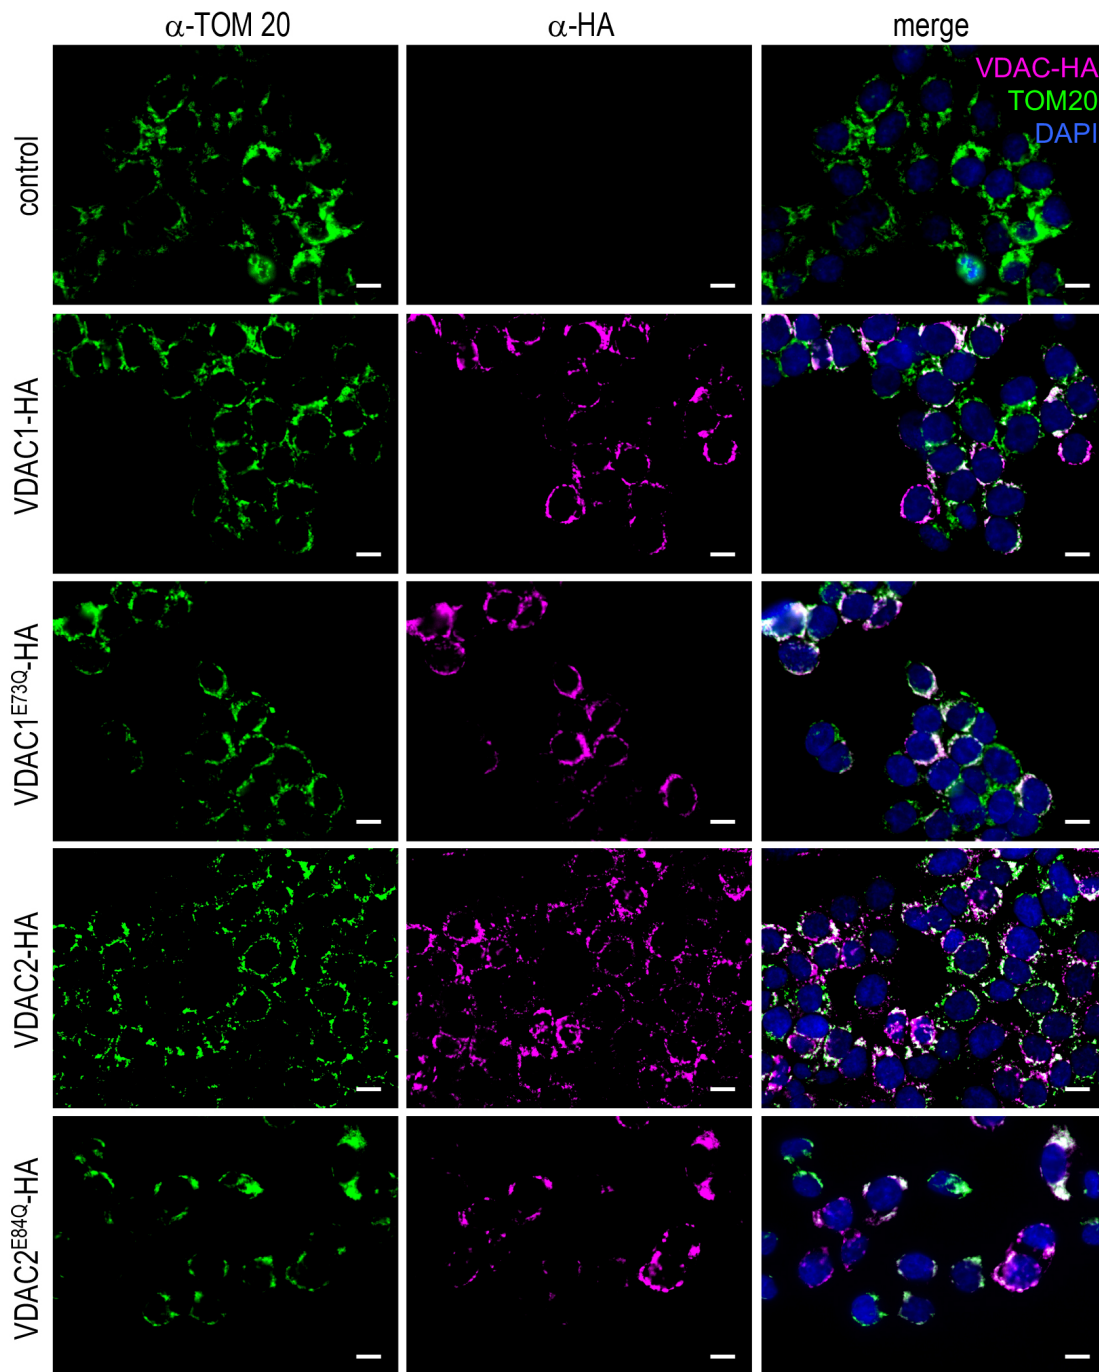

**Supplementary Figure 9 | Immunofluorescence microscopy of HCT116 VDAC1/2 double KO cells transduced with HA-tagged VDAC proteins.**

Human HCT116 VDAC1/2 double KO cells were stably transduced with HA-tagged VDAC1, VDAC1<sup>E73Q</sup>, VDAC2 or VDAC2<sup>E84Q</sup>. Next, cells were chemically fixed and then co-stained with DAPI (*blue*) and antibodies against the HA-tag (*red*) and the mitochondrial marker TOM20 (*green*). Scale bar, 10 $\mu$ m.

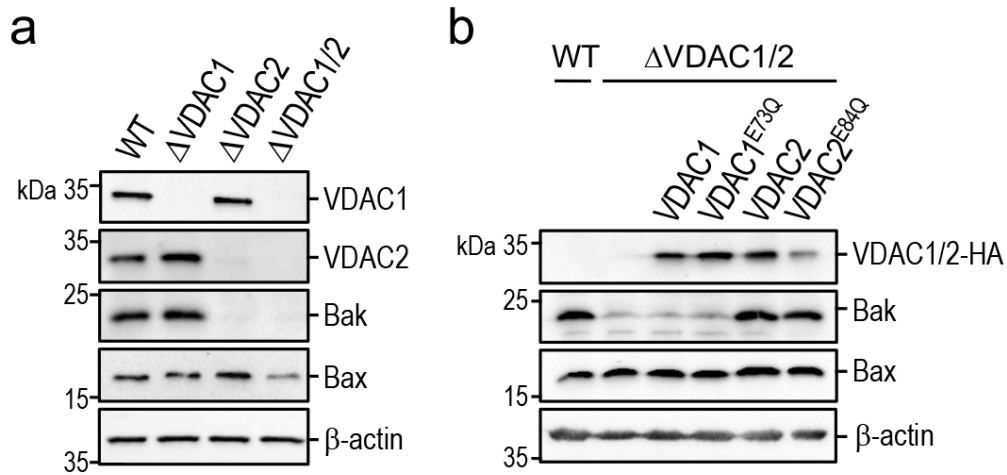

**Supplementary Figure 10 | Membrane-facing Glu84 in VDAC2 is dispensable for stabilizing Bak.**

**(a)** Wild-type (WT), VDAC1-KO ( $\Delta$ VDAC1), VDAC2-KO ( $\Delta$ VDAC1) and VDAC1/2-double KO ( $\Delta$ VDAC1/2) HCT116 cells were processed for immunoblotting with antibodies against VDAC1, VDAC2, Bak, Bax and  $\beta$ -actin.

**(b)** Human HCT116 VDAC1/2 double KO cells were stably transduced with HA-tagged VDAC1, VDAC1<sup>E73Q</sup>, VDAC2 or VDAC2<sup>E84Q</sup> and then processed for immunoblotting with antibodies against the HA-epitope, Bak, Bax and  $\beta$ -actin.

**Supplementary Table 1 | MS analysis of pacCer-photolabeled mitochondrial protein p33.**

| # | Accession # | Name                                      | kDa  | control #1 | pacCer #1 | control #2 | pacCer #2 |
|---|-------------|-------------------------------------------|------|------------|-----------|------------|-----------|
| 1 | VDAC1_human | Voltage-dependent anion channel protein 1 | 30.8 | 0          | 5         | 0          | 3         |
| 2 | VDAC2_human | Voltage-dependent anion channel protein 2 | 31.5 | 0          | 5         | 0          | 3         |
| 3 | G3P_human   | Glyceraldehyde-3-phosphate dehydrogenase  | 36.0 | 0          | 2         | 3          | 0         |
| 4 | ACTB_human  | Actin                                     | 41.7 | 0          | 0         | 0          | 2         |

Displayed are data from two independent experiments showing spectral counts for pacCer-labeled mitochondrial protein p33, which was affinity-purified from mitochondria that were UV-irradiated in the presence of pacCer-containing liposomes. Experiments in which pacCer was omitted from the liposomes served as control. Note that one of the spectral counts in the pacCer #1 and pacCer #2 experiments refers to a VDAC-derived peptide found in both VDAC1 and VDAC2 protein sequences.

**Supplementary Table 2 | Simulated times per system.**

| System                                 | Replica simulation times ( $\mu$ s) | Total simulation time ( $\mu$ s) |
|----------------------------------------|-------------------------------------|----------------------------------|
| VDAC1                                  | 56, 28, 28, 28, 79, 79              | 298                              |
| VDAC2                                  | 54, 29, 29, 29, 78, 79              | 298                              |
| VDAC3                                  | 30                                  | 30                               |
| VDAC1 <sup>E73Q</sup>                  | 56, 28, 28, 48                      | 160                              |
| VDAC2 <sup>E84Q</sup>                  | 24                                  | 24                               |
| VDAC1 <sup>E73D</sup>                  | 56, 23, 22, 22                      | 123                              |
| VDAC2 <sup>E84D</sup>                  | 18                                  | 18                               |
| VDAC1 protonated                       | 29, 23, 44                          | 96                               |
| VDAC2 protonated                       | 15, 17, 17                          | 49                               |
| VDAC1 without ceramide                 | 26                                  | 26                               |
| VDAC2 without ceramide                 | 23                                  | 23                               |
| VDAC1 <sup>E73Q</sup> without ceramide | 29                                  | 29                               |
| VDAC2 <sup>E84Q</sup> without ceramide | 29                                  | 29                               |
| VDAC1 in 100% DMPC                     | 27                                  | 27                               |

Displayed are the simulated times for each system, discriminated for each replica. Unless stated otherwise, proteins were simulated in an OMM model supplemented with 5 mol% ceramide (see Methods). The main (VDAC1 and VDAC2) systems were simulated for a total of 0.6 ms (0.3 ms each). The grand total simulation time was 1.23 ms.

**Supplementary Table 3 | Primers used in this study.**

| <b>Primer name</b> | <b>Primer sequence (5'-3')</b>                        |
|--------------------|-------------------------------------------------------|
| pColdI-hVDAC1 F    | ATCATATCGAAGGTAGGCACGCTGTGCCACCCAC                    |
| pColdI-hVDAC1 R    | GCTTTTAAGCAGAGATTACCTATTTATGCTTGAAATTCCAGTCCTAGACCAAG |
| pColdI-hVDAC2 F    | TGGAGCTCGGTACCCTCGAGATGGCGACCCACGGAC                  |
| pColdI-hVDAC2 R    | GCTTTTAAGCAGAGATTACCTATCTAGATTAAGCCTCCA ACTCCAGGGC    |
| hVDAC1-E73Q F      | ATGGACTGAGTACGGCCTGACGTTTACACAGAAATGG AATACCGAC       |
| hVDAC1-E73Q R      | GTCGGTATTCCATTTCTGTGTAAACGTCAGGCC                     |
| hVDAC2-E84Q F      | GGTCTGACTTTCACACAAAAGTGGAACACTGATAAC                  |
| hVDAC2-E84Q R      | GTTATCAGTGTTCCACTTTTGTGTGAAAGTCAGACC                  |
| pLNCX2-hVDAC1 F    | TCATCACTCGAGGCAATGGCTGTGCCACCC                        |
| pLNCX2-hVDAC2 F    | TCATCACTCGAGGCAATGGCGACCCACGGA                        |
| pLNCX2-hVDAC1/2 R  | TCATACGCGGCCGCTCAGGCGTAATCCGGCACATCATAG               |

# Uncropped Figures

**Fig. 1e**

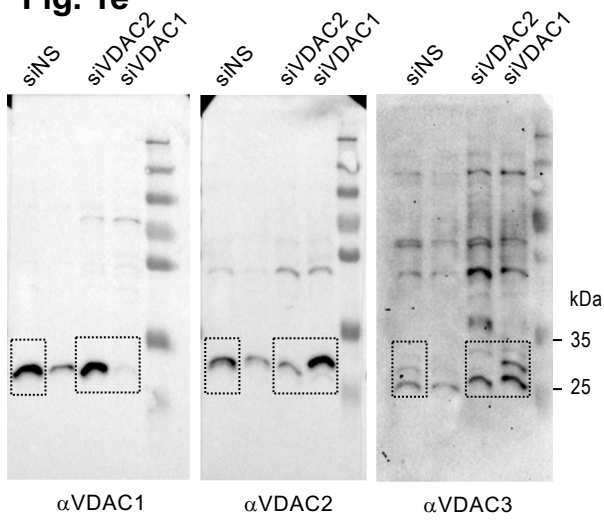

**Fig. 1f**

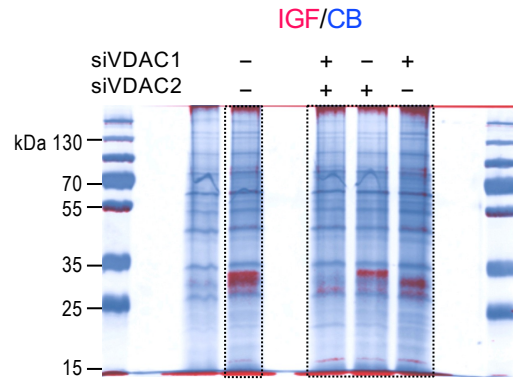

**Fig. 1h**

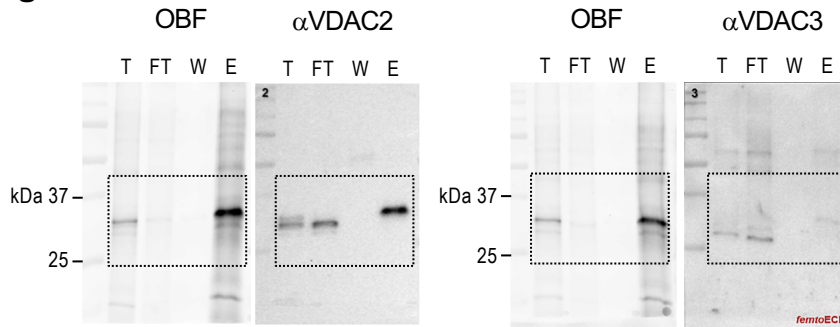

**Fig. 3c**

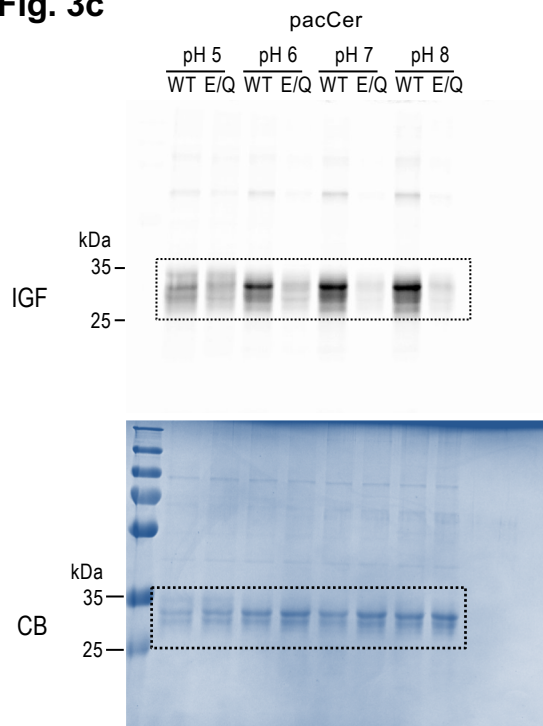

**Fig. 5a**

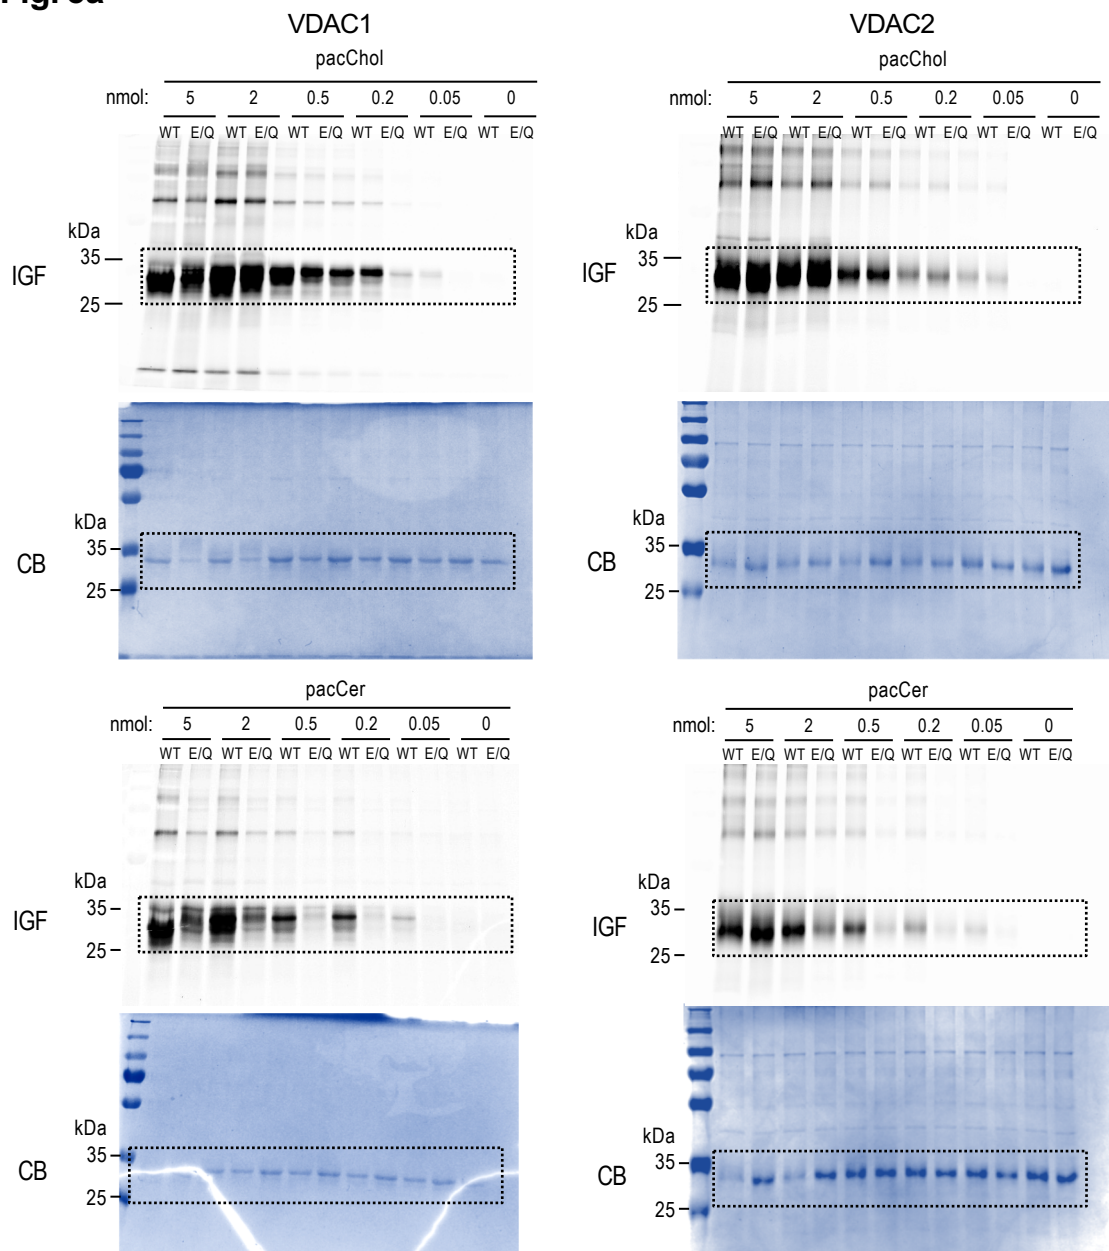



**Fig. 5b**

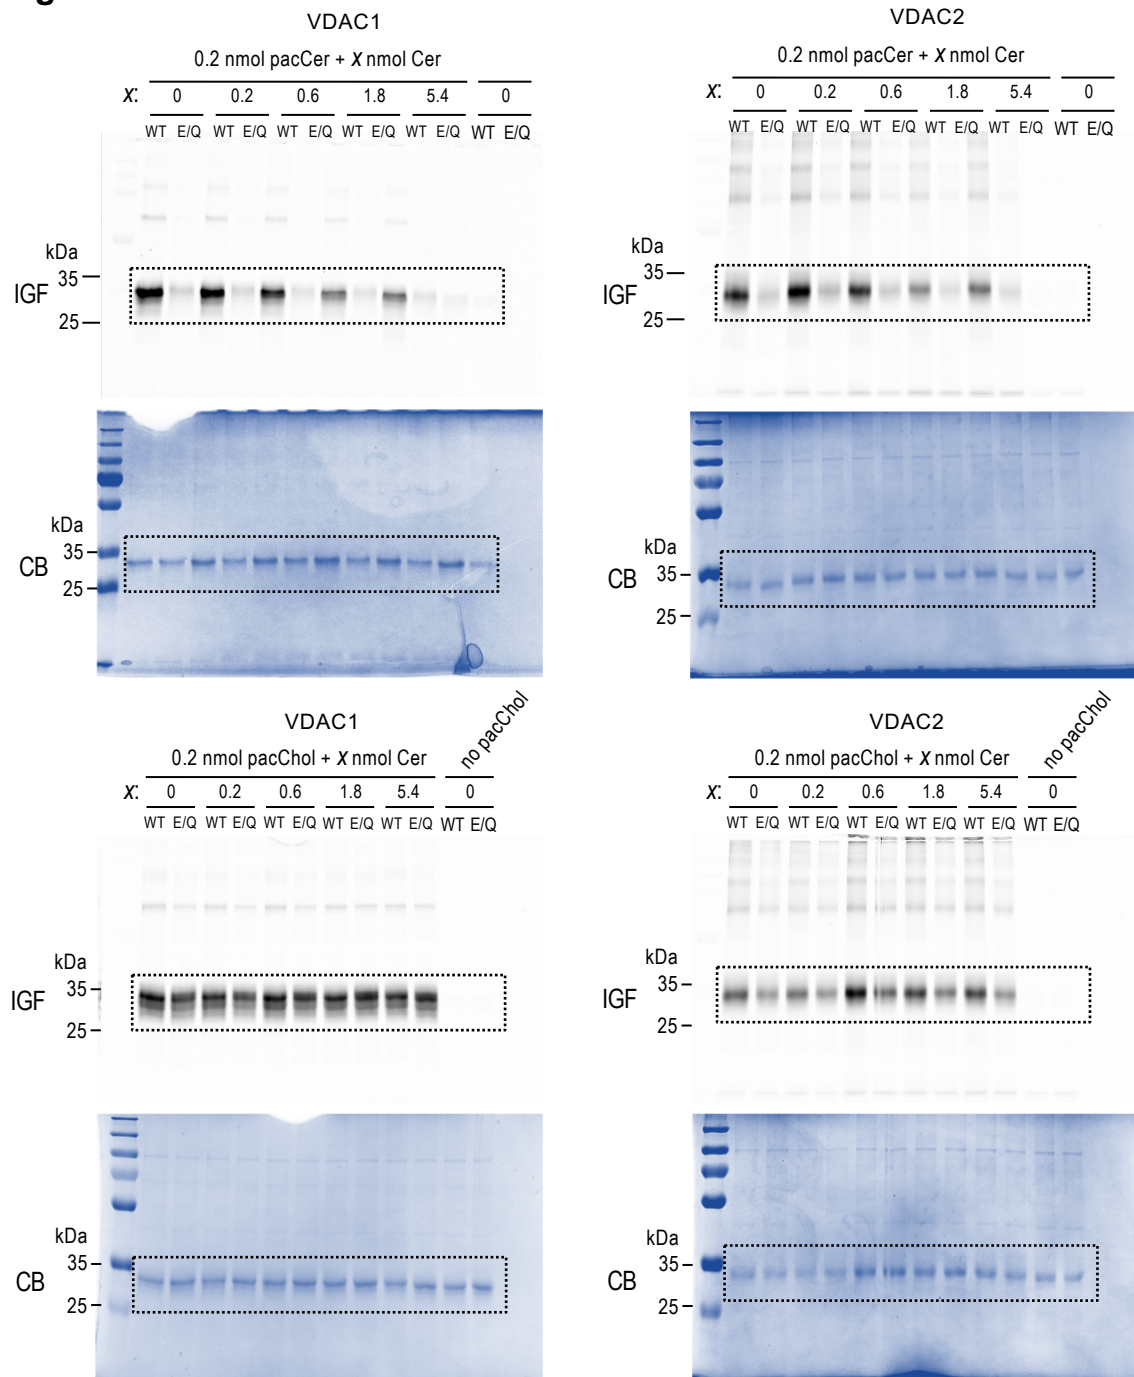

**Fig. 6c**

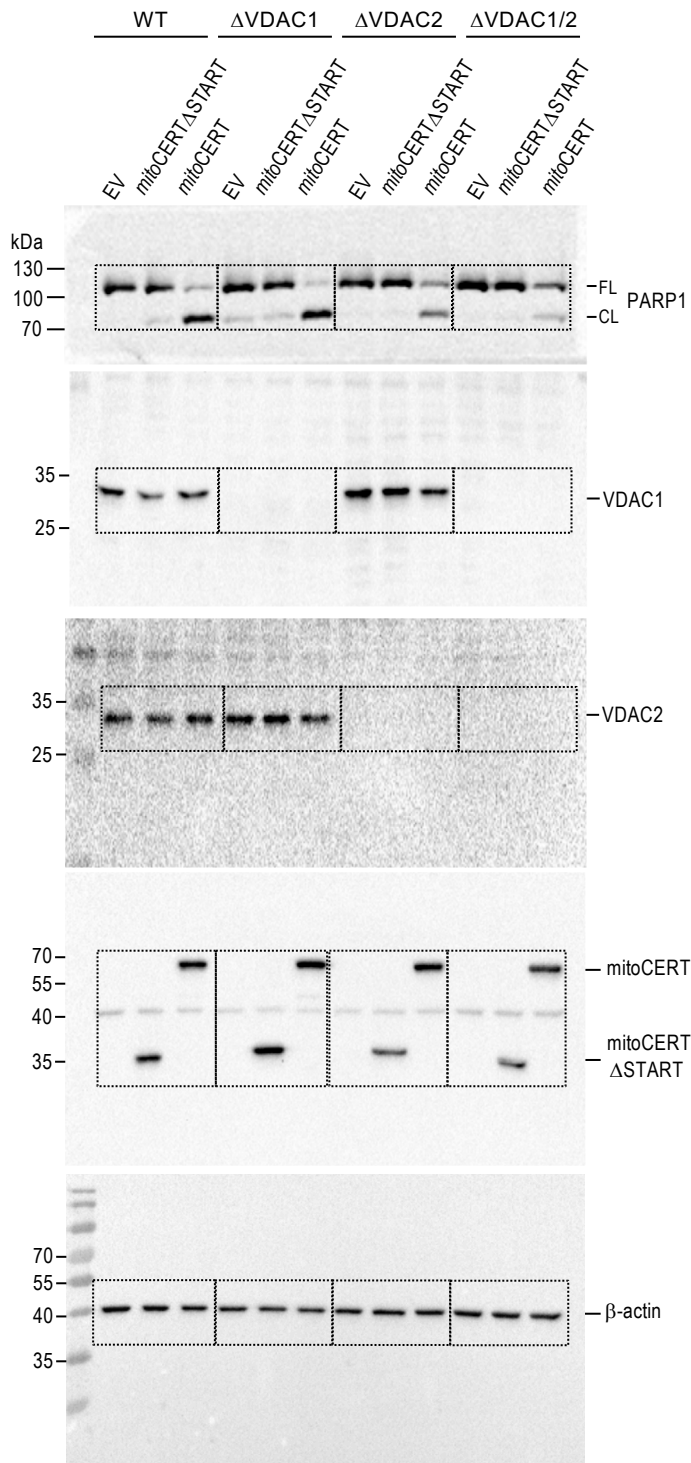

**Fig. 7a**

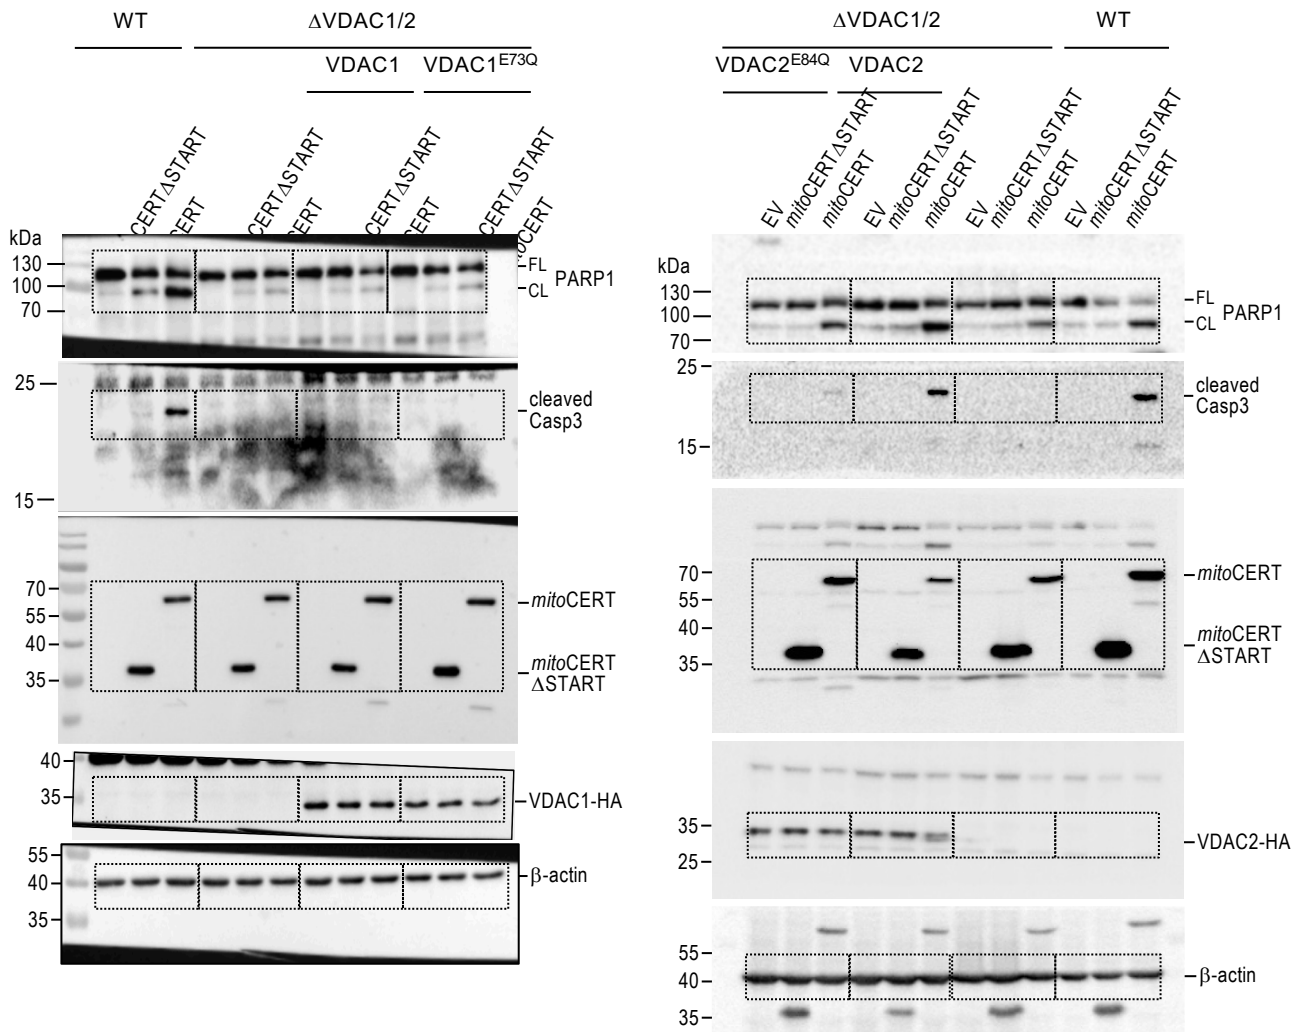

**Suppl. Fig. 1b**

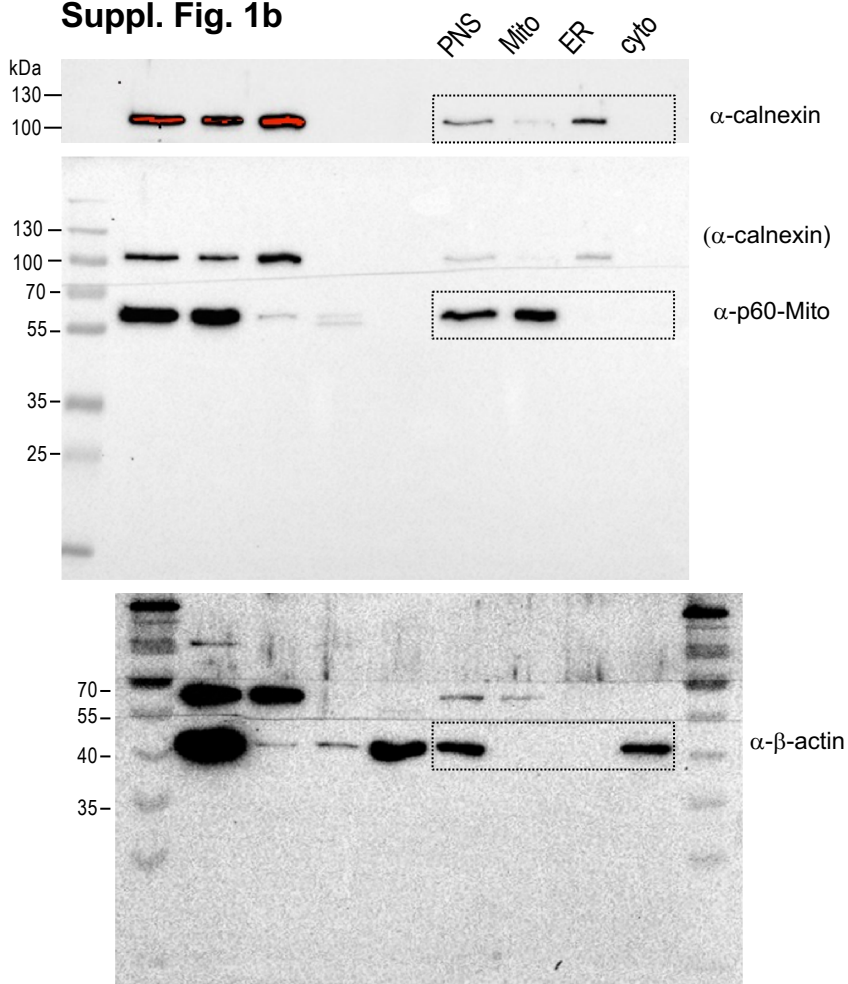

**Suppl. Fig. 7b**

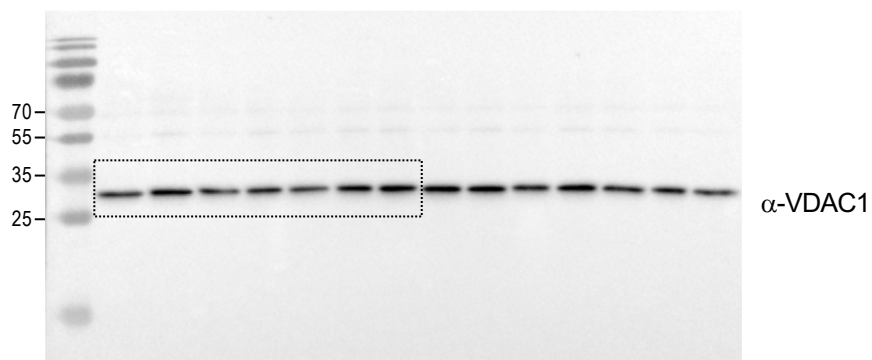

Suppl. Fig. 8

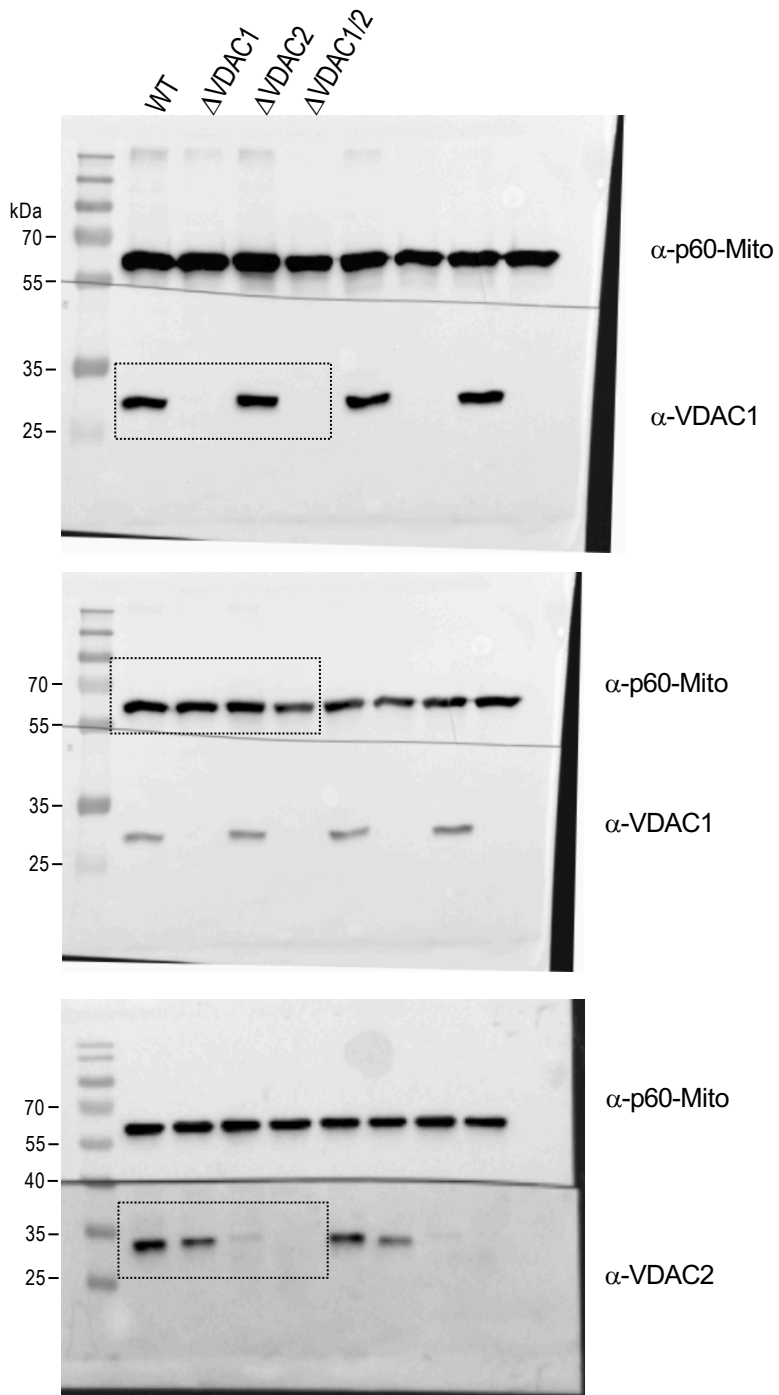

Suppl. Fig. 10a

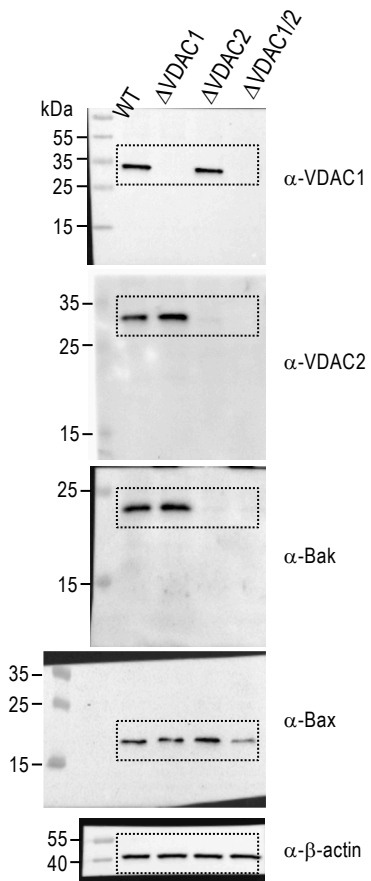

Suppl. Fig. 10b

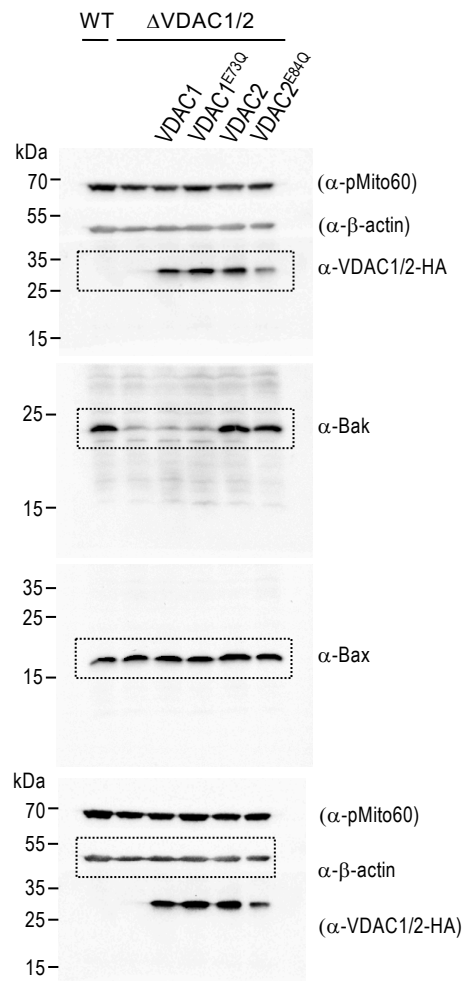

Supplement: 41467_2019_9654_MOESM1_ESM.pdf [file 41467_2019_9654_MOESM1_ESM.pdf]
