# Supplementary material for: Ceramides bind VDAC2 to trigger mitochondrial apoptosis
Source: PubMed Central journal article supplement (PMC6478893; doi:10.1038/s41467-019-09654-4), 2019-04-23
Supplement: 41467_2019_9654_MOESM4_ESM.pdf [file 41467_2019_9654_MOESM4_ESM.pdf]

**Title: Supplementary Movie 1 MD simulation of VDAC1 in an outer mitochondrial membrane model containing 5 mol% ceramide.**

**Description:** MD simulation showing the approach and binding of a ceramide molecule on VDAC1 to the vicinity of membrane-facing glutamate residue Glu73 over a 2.3  $\mu$ s period. Protein surface colours mark polar (green), apolar (white), cationic (blue) or anionic (red) residues.

**Title: Supplementary Movie MD simulation of VDAC2 in an outer mitochondrial membrane model containing 5 mol% ceramide.**

**Description:** MD simulation showing the approach and binding of a ceramide molecule on VDAC2 to the vicinity of membrane-facing glutamate residue Glu84 over a 6.0  $\mu$ s period. Protein surface colours mark polar (green), apolar (white), cationic (blue) or anionic (red) residues.
